# Supplementary material for: Effectiveness and safety of ranibizumab 0.5 mg in treatment-naïve patients with diabetic macular edema: Results from the real-world global LUMINOUS study
Source: PubMed Central journal article supplement (PMC7269267; doi:10.1371/journal.pone.0233595), 2020-06-03
Supplement: pone.0233595.s002.pdf [file pone.0233595.s002.pdf]

## List of Independent Ethics Committees (IECs) or Institutional Review Boards (IRBs).

### List of Independent Ethics Committees (IEC) or Institutional Review Boards (IRB) by study center

| Center Number | Ethics Committee or Institutional Review Board                         | Department / Organization                     | EC/IRB City   | EC/IRB State/ Province       | EC/IRB Postal Code | Center Country |
|---------------|------------------------------------------------------------------------|-----------------------------------------------|---------------|------------------------------|--------------------|----------------|
| 1100          | Comite Independiente de Etica para Ensayos en Famacologia Clinica      | Consultorio de Investigaciones Oftalmológicas | Buenos Aires  | Buenos Aires                 | C1027AAP           | Argentina      |
| 1101          | Comité de Ética en Investigación Instituto de Investigaciones Clínicas | Clínica Privada de Ojos José León Suárez      | Buenos Aires  | Buenos Aires                 | C1027AAP           | Argentina      |
| 1102          | Comite Independiente de Etica para Ensayos en Famacologia Clinica      | Consultorio Dr. Andres Jakofsky               | Buenos Aires  | Buenos Aires                 | C1027AAP           | Argentina      |
| 1103          | Comite Independiente de Etica para Ensayos en Famacologia Clinica      | Clínica de Ojos                               | Buenos Aires  | Entre Rios                   | C1027AAP           | Argentina      |
| 1104          | Comite Independiente de Etica para Ensayos en Famacologia Clinica      | DYTER S.A.                                    | Buenos Aires  | Mendoza                      | C1027AAP           | Argentina      |
| 1105          | Comite Independiente de Etica para Ensayos en Famacologia Clinica      | Clínica de Ojos Srl                           | Buenos Aires  | Santa Fe                     | C1027AAP           | Argentina      |
| 1106          | Comite Independiente de Etica para Ensayos en Famacologia Clinica      | Microcirugia Ocular (Clínica MICRO)           | Buenos Aires  | Santa Fe                     | C1027AAP           | Argentina      |
| 1107          | Comite Independiente de Etica para Ensayos en Famacologia Clinica      | Instituto Donato                              | Buenos Aires  | Ciudad Autonoma Buenos Aires | C1027AAP           | Argentina      |
| 1108          | Comite Independiente de Etica para Ensayos en Famacologia Clinica      | Instituto de la Visión                        | Buenos Aires  | Ciudad Autonoma Buenos Aires | C1027AAP           | Argentina      |
| 1109          | Comité de Ética en Investigación Instituto de Investigaciones Clínicas | *Oftalmologia Integral*                       | Mar del Plata | Buenos Aires                 | B7600FZN           | Argentina      |
| 1110          | Comité de Ética en Investigación Instituto de Investigaciones Clínicas | Clinica Modelo de Lanus                       | Buenos Aires  | Buenos Aires                 | C1027AAP           | Argentina      |
| 1111          | Comite Independiente de Etica para Ensayos en Famacologia Clinica      | Centro Oftalmologico Ventola                  | Buenos Aires  | Buenos Aires                 | C1027AAP           | Argentina      |
| 1113          | Comite Independiente de Etica para Ensayos en Famacologia Clinica      | Clínica Dr Rivero Covre                       | Buenos Aires  | Santa Fe                     | C1027AAP           | Argentina      |
| 1114          | Comite Independiente de Etica Fundacion Rusculleda                     | Instituto Oftalmológico de Córdoba SA         | Cordoba       | Cordoba                      | X5003DC E          | Argentina      |
| 1115          | Comite de Etica de CER Investigaciones Clinicas (CECIC)                | Hospital Oftalmológico Malvinas Argentinas    | Quilmes       | Buenos Aires                 | B1878DVB           | Argentina      |
| 1116          | Comite Independiente de Etica para Ensayos en Famacologia Clinica      | Consultorios Oftalmologico Dres Fugazzotto    | Buenos Aires  | Mendoza                      | C1027AAP           | Argentina      |
| 1117          | Comite Independiente de Etica para Ensayos en Famacologia Clinica      | Plaza Vision S.A.                             | Buenos Aires  | Mendoza                      | C1027AAP           | Argentina      |

|      |                                                                   |                                                     |                |                 |          |           |
|------|-------------------------------------------------------------------|-----------------------------------------------------|----------------|-----------------|----------|-----------|
| 1118 | Comite Independiente de Etica para Ensayos en Famacologia Clinica | Grupo laser Vision - Rosario Eximer Laser Vision    | Buenos Aires   | Santa Fe        | C1027AAP | Argentina |
| 1119 | Comite de Etica de CER Investigaciones Clinicas (CECIC)           | Clínica Oftalmológica Meroni                        | Quilmes        | Buenos Aires    | B1878DVB | Argentina |
| 3001 | Ethik-Kommision Der Medizinischen Universitat Wien                | General University Hospital of Vienna               | Wien           | Vienna          | 1090     | Austria   |
| 3002 | Ethik-Kommision Der Medizinischen Universitat Wien                | Prof. Dr. Siegfried Priglinger                      | Wien           | Vienna          | 1090     | Austria   |
| 2000 | NSW Government Health Sydney Local Health District                | Sydney Eye Hospital, Research Development Office    | Camperdown     | New South Wales | 2050     | Australia |
| 2001 | Bellberry Human Research Ethics Committee                         | Lions Eye Institute                                 | North Adelaide | South Australia | 5065     | Australia |
| 2002 | Human Research Ethics Committee (Tasmania) Network                | Hobart Eye Surgeons, University of Tasmania         | Hobart         | Tasmania        | 7001     | Australia |
| 2003 | Bellberry Human Research Ethics Committee                         | Eye Consultants SA                                  | North Adelaide | South Australia | 5065     | Australia |
| 2004 | Bellberry Human Research Ethics Committee                         | Vision Eye Institute Chatswood                      | North Adelaide | South Australia | 5065     | Australia |
| 2005 | Tasmania Health and Medical Human Research Ethics Committee       | Office of Research Services, University of Tasmania | Hobart         | Tasmania        | 7001     | Australia |
| 2006 | Bellberry Human Research Ethics Committee                         | Retina & Vitreous Centre                            | North Adelaide | New South Wales | 5065     | Australia |
| 2007 | Bellberry Human Research Ethics Committee                         | Vision Retinal Institute                            | North Adelaide | Queensland      | 5065     | Australia |
| 2008 | Bellberry Human Research Ethics Committee                         | Forster Eye Surgery                                 | North Adelaide | New South Wales | 5065     | Australia |
| 2010 | The Royal Victorian Eye & Ear Hospital                            | Human Research & Ethics Committee                   | East Melbourne | Victoria        | 8002     | Australia |
| 2011 | Bellberry Human Research Ethics Committee                         | Brisbane Eye Clinic                                 | North Adelaide | Queensland      | 5065     | Australia |
| 2012 | Bellberry Human Research Ethics Committee                         | Sydney Retina Eye Clinic and Day Surgery            | North Adelaide | New South Wales | 5065     | Australia |
| 2013 | Bellberry Human Research Ethics Committee                         | Macquarie University                                | North Adelaide | New South Wales | 5064     | Australia |
| 2014 | Bellberry Human Research Ethics Committee                         | Marsden Eye Specialists                             | North Adelaide | New South Wales | 5065     | Australia |
| 2017 | Bellberry Human Research Ethics Committee                         | Southern Ophthalmology                              | North Adelaide | New South Wales | 5065     | Australia |
| 2018 | Bellberry Human Research Ethics Committee                         | Strathfield Retina Clinic                           | North Adelaide | New South Wales | 5065     | Australia |
| 2019 | Bellberry Human Research Ethics Committee                         | Retina Associates - Chatswood Retina Service        | North Adelaide | New South Wales | 5065     | Australia |
| 2020 | Bellberry Human Research Ethics Committee                         | Macquarie University                                | North Adelaide | New South Wales | 5065     | Australia |
| 2021 | Bellberry Human Research Ethics Committee                         | Adelaide Eye and Retina Centre                      | North Adelaide | South Australia | 5065     | Australia |
| 2024 | Bellberry Human Research Ethics Committee                         | Queensland Eye Institute                            | North Adelaide | Queensland      | 5065     | Australia |

|      |                                                 |                                                                    |                |                   |         |           |
|------|-------------------------------------------------|--------------------------------------------------------------------|----------------|-------------------|---------|-----------|
| 2025 | Bellberry Human Research Ethics Committee       | Melbourne Retina Associates                                        | North Adelaide | Victoria          | 5065    | Australia |
| 2026 | Bellberry Human Research Ethics Committee       | Private Rooms, Eye Clinic (B4a) Westmead Hospital                  | North Adelaide | New South Wales   | 5065    | Australia |
| 2032 | Bellberry Human Research Ethics Committee       | St. John of God Hospital                                           | North Adelaide | Victoria          | 5065    | Australia |
| 2034 | Bellberry Human Research Ethics Committee       | Oakleigh Eye Center                                                | North Adelaide | Victoria          | 5065    | Australia |
| 2035 | Bellberry Human Research Ethics Committee       | Retina and Vitreous Centre                                         | North Adelaide | New South Wales   | 5065    | Australia |
| 2037 | Bellberry Human Research Ethics Committee       | Waverley Eye Clinic                                                | North Adelaide | Victoria          | 5065    | Australia |
| 3100 | Committee for Medical Ethics/Clinical Research  | Faculty of Medicine UZ Gathuisberg                                 | Leuven         |                   | 3000    | Belgium   |
| 3101 | Committee for Medical Ethics/Clinical Research  | Faculty of Medicine UZ Gathuisberg                                 | Leuven         | Hasselt           | 3000    | Belgium   |
| 3102 | Committee for Medical Ethics/Clinical Research  | Faculty of Medicine UZ Gathuisberg                                 | Leuven         |                   | 3000    | Belgium   |
| 3104 | Committee for Medical Ethics/Clinical Research  | Faculty of Medicine UZ Gathuisberg                                 | Leuven         |                   | 3000    | Belgium   |
| 3106 | Committee for Medical Ethics/Clinical Research  | Faculty of Medicine UZ Gathuisberg                                 | Leuven         |                   | 3000    | Belgium   |
| 3107 | Committee for Medical Ethics/Clinical Research  | Faculty of Medicine UZ Gathuisberg                                 | Leuven         |                   | 3000    | Belgium   |
| 3110 | Committee for Medical Ethics/Clinical Research  | Faculty of Medicine UZ Gathuisberg                                 | Leuven         |                   | 3000    | Belgium   |
| 3111 | Committee for Medical Ethics/Clinical Research  | Faculty of Medicine UZ Gathuisberg                                 | Leuven         |                   | 3000    | Belgium   |
| 3112 | Committee for Medical Ethics/Clinical Research  | Faculty of Medicine UZ Gathuisberg                                 | Leuven         |                   | 3000    | Belgium   |
| 3113 | Comite d'Ethique Centre Hospitalier de Mouscron | Centre Hospitalier de Mouscron                                     | Mouscron       |                   | 7700    | Belgium   |
| 3114 | Committee for Medical Ethics/Clinical Research  | Faculty of Medicine UZ Gathuisberg                                 | Leuven         |                   | 3000    | Belgium   |
| 3117 | Committee for Medical Ethics/Clinical Research  | Faculty of Medicine UZ Gathuisberg                                 | Leuven         |                   | 3000    | Belgium   |
| 3118 | Committee for Medical Ethics/Clinical Research  | Faculty of Medicine UZ Gathuisberg                                 | Leuven         |                   | 3000    | Belgium   |
| 3120 | Committee for Medical Ethics/Clinical Research  | Faculty of Medicine UZ Gathuisberg                                 | Leuven         |                   | 3000    | Belgium   |
| 1200 | Hospital Municipal Dr. Mario Gatti              | Centro Medico de Oftalmologia                                      | Cambui         | Campinas          | 13092   | Brazil    |
| 1203 | Comissao Nacional de Etica Em Pesquisa          | Instituto da Visão                                                 | Belo Horizonte | Minas Gerais      | 30150   | Brazil    |
| 1204 | Comissao Nacional de Etica Em Pesquisa          | HFSE - Hospital Federal dos Servidores do Estado do Rio de Janeiro | Belo Horizonte | Rio de Janeiro    | 30150   | Brazil    |
| 1205 | Comissao Nacional de Etica Em Pesquisa          | CBCO - Centro Brasileiro de Cirurgia de Olhos                      | Belo Horizonte | Goiás             | 30150   | Brazil    |
| 1208 | Comissao Nacional de Etica Em Pesquisa          | ANGIOCORPORE                                                       | Belo Horizonte | Sao Paulo         | 30150   | Brazil    |
| 1209 | Comissao Nacional de Etica Em Pesquisa          | Clínica Lavinsky Oftalmologia                                      | Belo Horizonte | Rio Grande do Sul | 30150   | Brazil    |
| 1000 | Ontario IRB/REB                                 | IRB Services                                                       | Aurora         | New Brunswick     | L4G 0A5 | Canada    |

|      |                                                     |                                                                                |                |                  |         |        |
|------|-----------------------------------------------------|--------------------------------------------------------------------------------|----------------|------------------|---------|--------|
| 1001 | Ontario IRB/REB                                     | IRB Services                                                                   | Aurora         | Nova Scotia      | L4G 0A5 | Canada |
| 1003 | Ontario IRB/REB                                     | IRB Services                                                                   | Aurora         | Ontario          | L4G 0A5 | Canada |
| 1008 | Ontario IRB/REB                                     | IRB Services                                                                   | Aurora         | Ontario          | L4G 0A5 | Canada |
| 1007 | University Health Network                           | Research Ethics Board                                                          | Toronto        | Ontario          | M5G 1Z5 | Canada |
| 1006 | Ontario IRB/REB                                     | IRB Services                                                                   | Aurora         | Ontario          | L4G 0A5 | Canada |
| 1005 | Ontario IRB/REB                                     | IRB Services                                                                   | Aurora         | Ontario          | L4G 0A5 | Canada |
| 1004 | Ontario IRB/REB                                     | IRB Services                                                                   | Aurora         | Quebec           | L4G 0A5 | Canada |
| 1010 | Ontario IRB/REB                                     | IRB Services                                                                   | Aurora         | Quebec           | L4G 0A5 | Canada |
| 1011 | Ottawa Health Science Network Research Ethics Board | The Ottawa Hospital - General Campus, University of Ottawa Eye Institute       | Ottawa         | Ontario          | K1Y 4E9 | Canada |
| 1012 | Ontario IRB/REB                                     | The Retina Centre of Ottawa                                                    | Aurora         | Ontario          | L4G 0A5 | Canada |
| 1013 | Ontario IRB/REB                                     | IRB Services                                                                   | Aurora         | Ontario          | L4G 0A5 | Canada |
| 1014 | Ontario IRB/REB                                     | IRB Services                                                                   | Aurora         | British Columbia | L4G 0A5 | Canada |
| 1015 | Health Research Ethics Board of Alberta             | IRB Services                                                                   | Edmonton       | Alberta          | T5J 4A7 | Canada |
| 1016 | Ontario IRB/REB                                     | Clinical Trials Committee                                                      | Aurora         | Ontario          | L4G 0A5 | Canada |
| 1018 | Ontario IRB/REB                                     | IRB Services                                                                   | Aurora         | Ontario          | L4G 0A5 | Canada |
| 1020 | Ontario IRB/REB                                     | IRB Services                                                                   | Aurora         | Ontario          | L4G 0A5 | Canada |
| 1021 | Ontario IRB/REB                                     | IRB Services                                                                   | Aurora         | Ontario          | L4G 0A5 | Canada |
| 1019 | Ontario IRB/REB                                     | IRB Services                                                                   | Aurora         | Ontario          | L4G 0A5 | Canada |
| 8200 | Resolucion Comite Etico Cientifico                  | Hospital del Cobre Salvador Allende Gossens                                    | La Serena      |                  | 1399001 | Chile  |
| 2101 | Beijing Tongren Hospital EC                         | Renmin Hospital of Wuhan University                                            | Wuhan          | Hubei            | 430060  | China  |
| 2102 | Beijing Tongren Hospital EC                         | No. 10 People's Hospital of Shanghai                                           |                | Shanghai         | 200072  | China  |
| 2104 | Beijing Tongren Hospital EC                         | Eye and ENT hospital                                                           |                | Shanghai         | 200000  | China  |
| 2106 | Beijing Tongren Hospital EC                         | Zhongshan Ophthalmic Center, Sun Yat-sen University                            | Guangzhou      | Guangdong        | 510060  | China  |
| 2107 | Beijing Tongren Hospital EC                         | Peking University First Hospital                                               | Beijing, P. R. | Beijing          | 100034  | China  |
| 2108 | Beijing Tongren Hospital EC                         | Tianjin Medical University Eye Center                                          | Tianjin        |                  | 300384  | China  |
| 2109 | Beijing Tongren Hospital EC                         | Xinhua Hospital Affiliated to Shanghai Jiao Tong University School of Medicine |                | Shanghai         | 200092  | China  |
| 2100 | Beijing Tongren Hospital EC                         | Beijing Tong Ren Hospital, Capital Medical University                          |                | Beijing          | 100730  | China  |
| 2115 | Beijing Tongren Hospital EC                         | Peking University Third Hospital                                               |                | Beijing          | 100191  | China  |
| 2116 | Beijing Tongren Hospital EC                         | Chinese PLA General Hospital                                                   | Beijing        | Beijing          | 100853  | China  |
| 2117 | Beijing Tongren Hospital EC                         | Beijing Hospital                                                               |                | Beijing          | 100730  | China  |
| 2119 | Beijing Tongren Hospital EC                         | Peking Union Medical College Hospital                                          |                | Beijing          | 100032  | China  |
| 2121 | Beijing Tongren Hospital EC                         | Southwest Hospital                                                             | Chongqing      | Chongqing        | 400038  | China  |
| 2122 | Beijing Tongren Hospital EC                         | Shanghai First People's Hospital                                               |                | Shanghai         | 200080  | China  |
| 2124 | Beijing Tongren Hospital EC                         | Xiamen Eye Centre                                                              | Fujian         |                  | 361001  | China  |

|      |                                                                                                    |                                                                 |                |                     |        |                |
|------|----------------------------------------------------------------------------------------------------|-----------------------------------------------------------------|----------------|---------------------|--------|----------------|
| 2127 | Beijing Tongren Hospital EC                                                                        | Shierming Eye Hospital                                          | Jinan          | Shandong            | 250001 | China          |
| 2128 | Beijing Tongren Hospital EC                                                                        | The Affiliated Hospital of Guiyang Medical College              | Guiyang        | Guizhou             | 500000 | China          |
| 2126 | Beijing Tongren Hospital EC                                                                        | No. 474 Hospital of PLA                                         | Wulumuqi       | Xinjiang Uygur      | 830000 | China          |
| 2130 | Beijing Tongren Hospital EC                                                                        | No.2 Hospital Affiliated to Jilin University                    | Changchun City | Jilin               | 130041 | China          |
| 2129 | Beijing Tongren Hospital EC                                                                        | Yunnan 2nd People's Hospital                                    | Kunming        | Yun'nan             | 650021 | China          |
| 1304 | Sociedad de Cirugia Ocular S.A.                                                                    | Sociedad de Cirugia Ocular                                      | Bogota         |                     |        | Colombia       |
| 1302 | Instituto para Ninos Ciegos y Sordos del Valle del Cauca                                           | Instituto de Ciegos y Sordos INSORP                             | San Fernando   | Cali                |        | Colombia       |
| 1306 | Sociedad de Cirugia Ocular S.A.                                                                    | Clínica Barraquer                                               | Bogota         |                     |        | Colombia       |
| 1307 | Sociedad de Cirugia Ocular S.A.                                                                    | Clinica Oftalmologica                                           | Bogota         |                     |        | Colombia       |
| 1309 | Comite de Etica en la Investigacion                                                                | OPTISALUD SAS                                                   | Bogota         |                     |        | Colombia       |
| 1308 | Sociedad de Cirugia Ocular S.A.                                                                    | Clínica Oftalmológica del Atlántico                             | Bogota         |                     |        | Colombia       |
| 3300 | Eticka komise Fakultni nemocnice Hradec Kralove                                                    | Fakultni nemocnice Hradec Kralove                               | Hradec Kralove |                     | 500 05 | Czech Republic |
| 3302 | Eticka komise Fakultni Nemocnice Kralovske Vinohrady                                               | Fakultni nemocnice Kralovske Vinohrady                          | Praha          |                     | 100 34 | Czech Republic |
| 3303 | Eticka komise FN Ostrava                                                                           | University Hopsital Ostrava                                     | Ostrava-Poruba |                     | 70800  | Czech Republic |
| 3305 | Eticka komise Vseobecne fakultni nemocnice v Praze                                                 | Charles University Hopsital 1st Faculty of Medicine             | Praha 2        | Praha 2             | 128 08 | Czech Republic |
| 3307 | Eticka komise Fakultni Nemocnice Brno                                                              | Fakultni nemocnice Brno                                         | Brno           |                     | 625 00 | Czech Republic |
| 3306 | Eticka komise Ustredni vojenske nemocnice                                                          | Ustredni vojenska nemocnice Praha                               | Praha 6        |                     | 169 02 | Czech Republic |
| 3301 | Eticka komise-Krajska zdravotni a.s.                                                               | Krajska zdravotni, a.s. - Masarykova nemocnice v Usti nad Labem | Usti nad Labem |                     | 40113  | Czech Republic |
| 3308 | Eticka komise FN a LF UP Olomouc-LEC                                                               | Fakultni nemocnice Olomouc                                      | Olomouc        |                     | 775 20 | Czech Republic |
| 3304 | Eticka komise Fakultni nemocnice Plzen                                                             | Fakultni nemocnice Plzen                                        | Plzen          |                     | 305 99 | Czech Republic |
| 3600 | Ethikkommission an der Medizinischen Fakultat der Rheinischen Friedrich-Wilhelms-Universitaet Bonn | University of Bonn                                              | Bonn           | Nordrhein Westfalen | 53105  | Germany        |
| 3601 | Aerztekammer Berlin                                                                                | Praxis Arzt für Augenheilkunde                                  | Berlin         |                     | 10969  | Germany        |
| 3604 | Ethik-Kommission der Ärztekammer Westfalen-Lippe und der Med. Fakultät der Universität Münster     | St. Franziskus Hospital                                         | Muenster       | Nordrhein Westfalen | 48147  | Germany        |
| 3602 | Ethikkommission an der Medizinischen Fakultat der Rheinischen Friedrich-Wilhelms-Universitaet Bonn | Augenarztpraxis Grasbon                                         | Bonn           | Bayern              | 53105  | Germany        |
| 3606 | Aerztekammer Berlin                                                                                | Praxis Steinberg                                                | Berlin         |                     | 10969  | Germany        |
| 3607 | Ethik-Kommission der Ärztekammer Westfalen-Lippe und der Med.                                      | Universitaetsklinikum Muenster                                  | Muenster       | Nordrhein Westfalen | 48147  | Germany        |

|      |                                                                                                                   |                                                             |           |                           |       |         |
|------|-------------------------------------------------------------------------------------------------------------------|-------------------------------------------------------------|-----------|---------------------------|-------|---------|
|      | Fakultät der Universität<br>Münster                                                                               |                                                             |           |                           |       |         |
| 3608 | Ethikkommission der<br>erztekammer Hamburg                                                                        | Praxis_Dr Kaupke                                            | Hamburg   |                           | 22083 | Germany |
| 3609 | Ethik-Kommission der<br>Ärztekammer Westfalen-<br>Lippe und der Med.<br>Fakultät der Universität<br>Münster       | Klinikum<br>Lüdenscheid                                     | Muenster  | Nordrhein<br>Westfalen    | 48147 | Germany |
| 3611 | Landesaerztekammer<br>Baden-Wuerttemberg                                                                          | Dr. Rabethge Klinik<br>GmbH                                 | Stuttgart | Baden<br>Wuerttem<br>berg | 70597 | Germany |
| 3612 | Universitaetsklinikum<br>Tuebingen                                                                                | Eberhard Karls<br>University Eye<br>Hospital                | Tuebingen | Baden<br>Wuerttem<br>berg | 72074 | Germany |
| 3615 | Ethik-Kommission der<br>Aerztekammer<br>Niedersachsen                                                             | Klinikum Osnabrück                                          | Hannover  | Niedersac<br>hsen         | 30175 | Germany |
| 3616 | Geschaefsstelle der<br>Ethikkommission                                                                            | Universitaetsklinikum<br>Koeln                              | Koeln     | Nordrhein<br>Westfalen    | 50931 | Germany |
| 3628 | Augenlaserzentrum Neu-<br>Ulm                                                                                     | Augenlaserzentrum                                           | Neu-Ulm   | Bayern                    | 89231 | Germany |
| 3629 | Ethik-Kommission der<br>Aerztekammer<br>Niedersachsen                                                             | Augenklinik<br>Dannenberg                                   | Hannover  | Niedersac<br>hsen         | 30175 | Germany |
| 3632 | Ethik-Kommission der<br>Ärztekammer Westfalen-<br>Lippe und der<br>Westfälischen Wilhelms-<br>Universität Münster | Private practice_ Dr<br>Grote-Schmidt                       | Münster   | Nordrhein<br>Westfalen    | 48147 | Germany |
| 3631 | An die Ethik-Kommission<br>der Bayerischen<br>Landesärztekammer                                                   | Fachärztin für<br>Augenheilkunde                            | Munich    | Bayern                    | 81677 | Germany |
| 3633 | An die Ethik-Kommission<br>der Bayerischen<br>Landesärztekammer                                                   | Klinikum Augsburg<br>Augenklinik                            | Munich    | Bayern                    | 81677 | Germany |
| 3630 | An die Ethik-Kommission<br>der Bayerischen<br>Landesärztekammer                                                   | Dr. med. Claus<br>Fuchs Fachärzte für<br>Augenheilkunde     | Munich    | Bayern                    | 81677 | Germany |
| 8300 | Comite de Bioetica de la<br>Universidad Central del<br>Ecuador (COBI-UCE)                                         | Centro Medico<br>Quirurgico<br>Oftalmologico Alta<br>Vision | Quito     |                           | 593   | Ecuador |
| 4600 | CEIC Hospital<br>Universitario Ramon y<br>Cajal                                                                   | Vissum Corporación<br>Oftalmológica –<br>Mirassierra        | Madrid    |                           | 28034 | Spain   |
| 4601 | CEIC Hospital<br>Universitario Ramon y<br>Cajal                                                                   | Hospital Clinico<br>Universitario Lozano<br>Blesa           | Madrid    |                           | 28035 | Spain   |
| 4602 | CEIC Hospital<br>Universitario Ramon y<br>Cajal                                                                   | Hospital Universitari i<br>Politecnic La Fe                 | Madrid    |                           | 28036 | Spain   |
| 4604 | CEIC Hospital<br>Universitario Ramon y<br>Cajal                                                                   | Hospital<br>Universitario Clinico<br>San Carlos             | Madrid    |                           | 28039 | Spain   |
| 4605 | CEIC Hospital<br>Universitario Ramon y<br>Cajal                                                                   | Hospital<br>Universitario 12 de<br>Octubre                  | Madrid    |                           | 28040 | Spain   |
| 4606 | CEIC Hospital<br>Universitario Ramon y<br>Cajal                                                                   | Hospital<br>Universitario Miguel<br>Servet                  | Madrid    |                           | 28043 | Spain   |
| 4608 | CEIC Hospital<br>Universitario Ramon y<br>Cajal                                                                   | Hospital de la Santa<br>Creu i Sant Pau                     | Madrid    |                           | 28045 | Spain   |
| 4612 | CEIC Hospital<br>Universitario Ramon y<br>Cajal                                                                   | Universidad de<br>Valladolid                                | Madrid    |                           | 28049 | Spain   |
| 4614 | CEIC Hospital<br>Universitario Ramon y<br>Cajal                                                                   | Hospital General de<br>Catalunya                            | Madrid    | Barcelona                 | 28049 | Spain   |

|      |                                           |                                                 |           |                 |        |        |
|------|-------------------------------------------|-------------------------------------------------|-----------|-----------------|--------|--------|
| 4615 | CEIC Hospital Universitario Ramon y Cajal | Hospital San Pedro                              | Madrid    | La Rioja        | 28049  | Spain  |
| 4620 | CEIC Hospital Universitario Ramon y Cajal | Hospital Universitario Principe de Asturias     | Madrid    | Madrid          | 28049  | Spain  |
| 4622 | CEIC Hospital Universitario Ramon y Cajal | Hospital Universitario de Burgos                | Madrid    |                 | 28049  | Spain  |
| 4623 | CEIC Hospital Universitario Ramon y Cajal | Hospital Universitario de Salamanca             | Madrid    |                 | 28049  | Spain  |
| 4624 | CEIC Hospital Universitario Ramon y Cajal | Hospital Moncloa                                | Madrid    |                 | 28049  | Spain  |
| 4625 | CEIC Hospital Universitario Ramon y Cajal | Hospital Universitario de Leon                  | Madrid    |                 | 28049  | Spain  |
| 4626 | CEIC Hospital Universitario Ramon y Cajal | Hospital Universitario Lucus Augusti            | Madrid    |                 | 28049  | Spain  |
| 4627 | CEIC Hospital Universitario Ramon y Cajal | Hospital Dos de Maig                            | Madrid    | Barcelona       | 28050  | Spain  |
| 4628 | CEIC Hospital Universitario Ramon y Cajal | Hospital Arnau de Vilanova                      | Madrid    |                 | 28050  | Spain  |
| 4630 | CEIC Hospital Universitario Ramon y Cajal | Clinica Rementeria                              | Madrid    |                 | 28051  | Spain  |
| 4634 | CEIC Hospital Universitario Ramon y Cajal | Centro de Oftalmología Barraquer                | Madrid    |                 | 28052  | Spain  |
| 4632 | CEIC Hospital Universitario Ramon y Cajal | Hospital Regional Universitario de Malaga       | Madrid    |                 | 28053  | Spain  |
| 4631 | CEIC Hospital Universitario Ramon y Cajal | Hospital Universitario Sant Joan de Reus        | Madrid    | Tarragona       | 28054  | Spain  |
| 4629 | CEIC Hospital Universitario Ramon y Cajal | Fundacio Privada Hospital Asil de Granollers    | Madrid    | Barcelona       | 28055  | Spain  |
| 4633 | CEIC Hospital Universitario Ramon y Cajal | Centro Oftalmologico Gaztambide                 | Madrid    |                 | 28056  | Spain  |
| 3500 | N/A                                       | Centre Hospitalier Intercommunal de Créteil     | Creteil   | Val de Marne    |        | France |
| 3501 | N/A                                       | Centre Ophtalmologique d'Imagerie et de Laser   | Paris     | Val de Marne    | 94010  | France |
| 3502 | N/A                                       | Clinique Ocean                                  | Vannes    | Côte-d'Or       | 75015  | France |
| 3503 | N/A                                       | CHU Dijon - Hopital General                     | Dijon     | Côte-d'Or       | 56000  | France |
| 3504 | N/A                                       | Visiopole Private Practice                      | Lagord    | Charente        | 21000  | France |
| 3505 | N/A                                       | CHU de Nice - Hôpital Lentral                   | Nice      | Alpes Maritimes | 17140  | France |
| 3506 | N/A                                       | Cabinet Odeon                                   | Paris     |                 | 060 06 | France |
| 3507 | N/A                                       | Groupe Hospitalier Pellegrin -Hôpital Pellegrin | Bordeaux  | Gironde         | 75006  | France |
| 3518 | N/A                                       | Centre Ophtalmologique de L'Odeon               | Paris     |                 | 33000  | France |
| 3508 | N/A                                       | Hôpital Lariboisière                            | Paris     |                 | 75006  | France |
| 3509 | N/A                                       | Polyclinique de Courlancy                       | Reims     | Marne           | 75475  | France |
| 3510 | N/A                                       | Clinique Orli Honore Cave                       | Montauban | Tarn et Garonne | 51100  | France |
| 3511 | N/A                                       | Cabinet d'Ophtalmologie                         | Melun     | Seine et Marne  | 82000  | France |

|      |                                                    |                                                  |                |                    |           |                |
|------|----------------------------------------------------|--------------------------------------------------|----------------|--------------------|-----------|----------------|
| 3512 | N/A                                                | CHU Nantes - Hôtel Dieu                          | Nantes Cedex 1 | Loire Atlantique   | 77000     | France         |
| 3513 | N/A                                                | Centre Hospitalier de la Croix Rousse            | Lyon           | Rhone              | 44093     | France         |
| 3514 | N/A                                                | CHU Toulouse, Hôpital Paule de Vignier           | Toulouse       | Cedex 9            | 69317     | France         |
| 3516 | N/A                                                | Fondation Ophthalmologique Adolphe de Rothschild | Paris          |                    | 31059     | France         |
| 3517 | N/A                                                | Clinique de Montargis                            | Montargis      | Loiret             | 75019     | France         |
| 5000 | NRES Committee Yorkshire and the Humber Leeds East | Central Ethics Committee                         | Jarrow         | Lancashire         | 45200     | United Kingdom |
| 5001 | NRES Committee Yorkshire and the Humber Leeds East | Central Ethics Committee                         | Jarrow         | South Yorkshire    | NE 32 3DT | United Kingdom |
| 5002 | NRES Committee Yorkshire and the Humber Leeds East | Central Ethics Committee                         | Jarrow         | Tyne & Wear        | NE 32 3DT | United Kingdom |
| 5003 | NRES Committee Yorkshire and the Humber Leeds East | Central Ethics Committee                         | Jarrow         |                    | NE 32 3DT | United Kingdom |
| 5004 | NRES Committee Yorkshire and the Humber Leeds East | Central Ethics Committee                         | Jarrow         | Surrey             | NE 32 3DT | United Kingdom |
| 5005 | NRES Committee Yorkshire and the Humber Leeds East | Central Ethics Committee                         | Jarrow         | North Yorkshire    | NE 32 3DT | United Kingdom |
| 5006 | NRES Committee Yorkshire and the Humber Leeds East | Central Ethics Committee                         | Jarrow         | Greater Manchester | NE 32 3DT | United Kingdom |
| 5009 | NRES Committee Yorkshire and the Humber Leeds East | Central Ethics Committee                         | Jarrow         |                    | NE 32 3DT | United Kingdom |
| 5030 | NRES Committee Yorkshire and the Humber Leeds East | Central Ethics Committee                         | Jarrow         | Greater London     | NE 32 3DT | United Kingdom |
| 5010 | NRES Committee Yorkshire and the Humber Leeds East | Central Ethics Committee                         | Jarrow         | Norfolk            | NE 32 3DT | United Kingdom |
| 5011 | NRES Committee Yorkshire and the Humber Leeds East | Central Ethics Committee                         | Jarrow         | Staffordshire      | NE 32 3DT | United Kingdom |
| 5012 | NRES Committee Yorkshire and the Humber Leeds East | Central Ethics Committee                         | Jarrow         |                    | NE 32 3DT | United Kingdom |
| 5013 | NRES Committee Yorkshire and the Humber Leeds East | Central Ethics Committee                         | Jarrow         | West Midlands      | NE 32 3DT | United Kingdom |
| 5014 | NRES Committee Yorkshire and the Humber Leeds East | Central Ethics Committee                         | Jarrow         | West Midlands      | NE 32 3DT | United Kingdom |
| 5015 | NRES Committee Yorkshire and the Humber Leeds East | Central Ethics Committee                         | Jarrow         | West Yorkshire     | NE 32 3DT | United Kingdom |
| 5024 | NRES Committee Yorkshire and the Humber Leeds East | Central Ethics Committee                         | Jarrow         | Surrey             | NE 32 3DT | United Kingdom |
| 5055 | NRES Committee Yorkshire and the Humber Leeds East | Central Ethics Committee                         | Jarrow         | Greater London     | NE 32 3DT | United Kingdom |
| 5036 | NRES Committee Yorkshire and the Humber Leeds East | Central Ethics Committee                         | Jarrow         | Gloucestershire    | NE 32 3DT | United Kingdom |
| 5037 | NRES Committee Yorkshire and the Humber Leeds East | Central Ethics Committee                         | Jarrow         | Greater London     | NE 32 3DT | United Kingdom |
| 5016 | NRES Committee Yorkshire and the Humber Leeds East | Central Ethics Committee                         | Jarrow         | West Midlands      | NE 32 3DT | United Kingdom |



|      |                                                          |                             |        |                    |           |                   |
|------|----------------------------------------------------------|-----------------------------|--------|--------------------|-----------|-------------------|
| 5029 | NRES Committee<br>Yorkshire and the<br>Humber Leeds East | Central Ethics<br>Committee | Jarrow | Hampshire          | NE 32 3DT | United<br>Kingdom |
| 5021 | NRES Committee<br>Yorkshire and the<br>Humber Leeds East | Central Ethics<br>Committee | Jarrow |                    | NE 32 3DT | United<br>Kingdom |
| 5017 | NRES Committee<br>Yorkshire and the<br>Humber Leeds East | Central Ethics<br>Committee | Jarrow | Hampshire          | NE 32 3DT | United<br>Kingdom |
| 5022 | NRES Committee<br>Yorkshire and the<br>Humber Leeds East | Central Ethics<br>Committee | Jarrow | Cheshire           | NE 32 3DT | United<br>Kingdom |
| 5018 | NRES Committee<br>Yorkshire and the<br>Humber Leeds East | Central Ethics<br>Committee | Jarrow | Greater<br>London  | NE 32 3DT | United<br>Kingdom |
| 5019 | NRES Committee<br>Yorkshire and the<br>Humber Leeds East | Central Ethics<br>Committee | Jarrow | North<br>Yorkshire | NE 32 3DT | United<br>Kingdom |
| 5020 | NRES Committee<br>Yorkshire and the<br>Humber Leeds East | Central Ethics<br>Committee | Jarrow | North<br>Yorkshire | NE 32 3DT | United<br>Kingdom |
| 5026 | NRES Committee<br>Yorkshire and the<br>Humber Leeds East | Central Ethics<br>Committee | Jarrow | West<br>Midlands   | NE 32 3DT | United<br>Kingdom |
| 5025 | NRES Committee<br>Yorkshire and the<br>Humber Leeds East | Central Ethics<br>Committee | Jarrow | West<br>Midlands   | NE 32 3DT | United<br>Kingdom |
| 5044 | NRES Committee<br>Yorkshire and the<br>Humber Leeds East | Central Ethics<br>Committee | Jarrow | Leicesters<br>hire | NE 32 3DT | United<br>Kingdom |
| 5031 | NRES Committee<br>Yorkshire and the<br>Humber Leeds East | Central Ethics<br>Committee | Jarrow | Isle of<br>Wight   | NE 32 3DT | United<br>Kingdom |
| 5032 | NRES Committee<br>Yorkshire and the<br>Humber Leeds East | Central Ethics<br>Committee | Jarrow | Lancashir<br>e     | NE 32 3DT | United<br>Kingdom |
| 5023 | NRES Committee<br>Yorkshire and the<br>Humber Leeds East | Central Ethics<br>Committee | Jarrow | West<br>Yorkshire  | NE 32 3DT | United<br>Kingdom |
| 5028 | NRES Committee<br>Yorkshire and the<br>Humber Leeds East | Central Ethics<br>Committee | Jarrow | Greater<br>London  | NE 32 3DT | United<br>Kingdom |
| 5033 | NRES Committee<br>Yorkshire and the<br>Humber Leeds East | Central Ethics<br>Committee | Jarrow | Greater<br>London  | NE 32 3DT | United<br>Kingdom |
| 5038 | NRES Committee<br>Yorkshire and the<br>Humber Leeds East | Central Ethics<br>Committee | Jarrow | Oxfordshir<br>e    | NE 32 3DT | United<br>Kingdom |
| 5027 | NRES Committee<br>Yorkshire and the<br>Humber Leeds East | Central Ethics<br>Committee | Jarrow | Essex              | NE 32 3DT | United<br>Kingdom |
| 5039 | NRES Committee<br>Yorkshire and the<br>Humber Leeds East | Central Ethics<br>Committee | Jarrow | Greater<br>London  | NE 32 3DT | United<br>Kingdom |
| 5034 | NRES Committee<br>Yorkshire and the<br>Humber Leeds East | Central Ethics<br>Committee | Jarrow | Merseysid<br>e     | NE 32 3DT | United<br>Kingdom |
| 5040 | NRES Committee<br>Yorkshire and the<br>Humber Leeds East | Central Ethics<br>Committee | Jarrow | Devon              | NE 32 3DT | United<br>Kingdom |
| 5041 | NRES Committee<br>Yorkshire and the<br>Humber Leeds East | Central Ethics<br>Committee | Jarrow | Highland<br>Region | NE 32 3DT | United<br>Kingdom |
| 5042 | NRES Committee<br>Yorkshire and the<br>Humber Leeds East | Central Ethics<br>Committee | Jarrow |                    | NE 32 3DT | United<br>Kingdom |
| 5047 | NRES Committee<br>Yorkshire and the<br>Humber Leeds East | Central Ethics<br>Committee | Jarrow | Norfolk            | NE 32 3DT | United<br>Kingdom |
| 5035 | NRES Committee<br>Yorkshire and the<br>Humber Leeds East | Central Ethics<br>Committee | Jarrow | Avon               | NE 32 3DT | United<br>Kingdom |

|      |                                                                    |                                                               |                 |                |           |                |
|------|--------------------------------------------------------------------|---------------------------------------------------------------|-----------------|----------------|-----------|----------------|
| 5043 | NRES Committee Yorkshire and the Humber Leeds East                 | Central Ethics Committee                                      | Jarrow          | Kent           | NE 32 3DT | United Kingdom |
| 5046 | NRES Committee Yorkshire and the Humber Leeds East                 | Central Ethics Committee                                      | Jarrow          | Derbyshire     | NE 32 3DT | United Kingdom |
| 5060 | NRES Committee Yorkshire and the Humber Leeds East                 | Central Ethics Committee                                      | Jarrow          | Bedfordshire   | NE 32 3DT | United Kingdom |
| 5061 | NRES Committee Yorkshire and the Humber Leeds East                 | Central Ethics Committee                                      | Jarrow          | Merseyside     | NE 32 3DT | United Kingdom |
| 5062 | NRES Committee Yorkshire and the Humber Leeds East                 | Central Ethics Committee                                      | Jarrow          | Worcestershire | NE 32 3DT | United Kingdom |
| 3700 | Scientific Council of University Eye Hospital of Haraklion         | University Eye Hospital of Heraklion                          | Heraklion       |                | 71201     | Greece         |
| 3701 | Scientific Council of Eye Hospital of Athens                       | Eye Hospital of Athens -1st Clinic                            | Athens          |                | 10672     | Greece         |
| 3702 | Scientific Council of Omma Ophthalmological Institute of Athens    | Omma Ophthalmological Institute of Athens                     | Athens          |                | 11525     | Greece         |
| 3703 | Scientific Council of General Hospital Papageorgiou                | General Hospital Papageorgiou                                 | Thessaloniki    |                | 56429     | Greece         |
| 3704 | Scientific Council of Red Cross Hospital                           | Red Cross Hospital - 2nd Clinic                               | Athens          |                | 11526     | Greece         |
| 3705 | Scientific Council of University Hospital of Alexandroupolis       | University General Hospital of Alexandroupolis                | Alexandroupolis |                | 68100     | Greece         |
| 3710 | Ethics Committee of University Hospital of Larissa                 | University General Hospital of Larissa                        | Mezourlo        |                | 41110     | Greece         |
| 3712 | Scientific Council of Athens Vision Eye Institute                  | Athens Vision Eye Institute                                   | Athens          |                | 17673     | Greece         |
| 3714 | Scientific Council of Athens Eye Hospital                          | Ophtalmiatrio Athinon - Athens Eye Hospital                   | Athens          |                | 10672     | Greece         |
| 3715 | Ethics Committee of General Hospital of Lamia                      | General Hospital of Lamia                                     | Lamia           |                | 35100     | Greece         |
| 3716 | Ethics Committee of University Hospital of Patra                   | University Hospital of Patras                                 | Patra           |                | 26504     | Greece         |
| 3717 | Ethics Committee of General Hospital of Rethymnon                  | General Hospital of Rethymnon                                 | Rethymnon       |                | 74100     | Greece         |
| 8800 | Research Ethics Committee (Kowloon Central/Kowloon East)           | Hong Kong Eye Hospital                                        | Kowloon         |                | N/A       | Hong Kong      |
| 3800 | Egeszsegügyi Tudományos Tanács Tudományos és Kutatásügyi Bizottság | Budapest Retina Associates                                    | Budapest        |                | 1051      | Hungary        |
| 3802 | Egeszsegügyi Tudományos Tanács Tudományos és Kutatásügyi Bizottság | Semmelweis Egyetem                                            | Budapest        |                | 1051      | Hungary        |
| 3801 | Egeszsegügyi Tudományos Tanács Tudományos és Kutatásügyi Bizottság | Debreceni Egyetem Klinikai Központ                            | Budapest        |                | 1051      | Hungary        |
| 3803 | Egeszsegügyi Tudományos Tanács Tudományos és Kutatásügyi Bizottság | Pécsi Tudományegyetem                                         | Budapest        |                | 1051      | Hungary        |
| 3804 | Egeszsegügyi Tudományos Tanács Tudományos és Kutatásügyi Bizottság | Szegedi Tudományegyetem Szent-Györgyi Albert Klinikai Központ | Budapest        |                | 1051      | Hungary        |

|      |                                                                                                           |                                                                                                |                 |                |        |         |
|------|-----------------------------------------------------------------------------------------------------------|------------------------------------------------------------------------------------------------|-----------------|----------------|--------|---------|
| 3900 | Beacon Hospital Research Ethics Committee                                                                 | Beacon Clinic                                                                                  | Sandyford       |                | 18     | Ireland |
| 3901 | Research Ethics Committee Southeast Area                                                                  | Whitfield Clinic                                                                               | Waterford       |                | X91    | Ireland |
| 3902 | Mater Misericordiae Univ Hospital Research Ethics Committee                                               | Mater Private Hospital                                                                         | Dublin          | Dublin         | 7      | Ireland |
| 3903 | Research Ethics Committee Southeast Area                                                                  | Waterford Regional Hospital                                                                    | Waterford       |                | X91    | Ireland |
| 8400 | Helsinki Committee, Rabin MC                                                                              | Rabin Medical Center-Beilinson Campus                                                          | Petah Tikva     |                | 49100  | Israel  |
| 8401 | Helsinki Committee, Sourasky MC                                                                           | Tel Aviv Sourasky Medical Center                                                               | Tel-Aviv        |                | 64239  | Israel  |
| 8402 | Helsinki Committee, Bnai-Zion                                                                             | Bnai Zion Medical Center                                                                       | Haifa           |                | 31048  | Israel  |
| 6003 | Prasad Eye Institute Ethics Committee                                                                     | L. V. Prasad Eye Institute                                                                     | Hyderabad       | Andhra Pradesh | 500034 | India   |
| 6002 | All India Institute of Medical Sciences Ethics Committee                                                  | All India Institute of Medical Sciences                                                        | Ansari Nagar    | Delhi          | 110029 | India   |
| 6000 | Aravind Eye Care System Ethical Committee                                                                 | Aravind Eye Hospital                                                                           | Coimbatore      | Tamilnadu      | 641014 | India   |
| 6004 | Sangini Hospital Ethics Committee                                                                         | Bankers Eye Institute                                                                          | Ahmedabad       | Gujarat        | 380006 | India   |
| 6005 | Sparsh Hospital Ethics Committee                                                                          | L. V. Prasad Eye Institute                                                                     | Bhubaneswar     | Orissa         | 751007 | India   |
| 6008 | Vision Research Foundation Ethics Sub-Committee                                                           | Sankara Nethralaya                                                                             | Chennai         | Tamilnadu      | 600006 | India   |
| 6010 | National Institute of Ophthalmology Ethics Committee                                                      | National Institute of Ophthalmology                                                            | Pune            | Maharashtra    | 411005 | India   |
| 4001 | Comitato Etico Interaziendale                                                                             | Reparto di Oculistica dell' Ospedale SS Antonio e Biagio e Cesare Arrigo de Alessandria        | Alessandria     |                | 15121  | Italy   |
| 4002 | Comitato Etico Indipendente - Azienda Ospedaliero-Universitaria                                           | Ente Ecclesiastico Ospedale Generale Regionale F Miulli                                        | Bari            | Bari           | 70124  | Italy   |
| 4003 | Reggio Calabria Comitato Etico                                                                            | Azienda Ospedaliera Bianchi Melacrino Morelli                                                  | Reggio Calabria |                | 89100  | Italy   |
| 4004 | Comitato Etico Dell' 'Universita' Cattolica Del Sacro Cuore                                               | Policlinico Universitario Agostino Gemelli                                                     | Roma            |                | 001 68 | Italy   |
| 4005 | Spedali Civili - Brescia Comitato Etico Provinciale                                                       | Azienda Socio Sanitaria Territoriale degli Spedali Civili di Brescia (Presidio Spedali Civili) | Brescia         |                | 25123  | Italy   |
| 4006 | Comitato per la Sperimentazione Clinica Medicinali dell'Az Ospedaliero Universitaria Pisana d. Pisa       | Azienda Ospedaliero Universitaria Cisanello                                                    | Pisa            |                | 56126  | Italy   |
| 4008 | Regione Autonoma Della Sardegna Azienda Ospedaliero Universitaria Di Cagliari Comitato Etico Indipendente | Ospedale S.Giovanni di Dio                                                                     | Cagliari        |                | 091 24 | Italy   |
| 4009 | Comitato Etico Dell' 'Universita' Dell' 'Universita' "Sapienza"                                           | Umberto I Pol. di Roma-Universita di Roma La Sapienza                                          | Roma            |                | 001 61 | Italy   |
| 4010 | Regione del Veneto Aziende U.L.S.S. n. 1                                                                  | Ospedale San Martino di Belluno                                                                | Belluno         |                | 27717  | Italy   |

|      |                                                                                                  |                                                 |                |               |          |       |
|------|--------------------------------------------------------------------------------------------------|-------------------------------------------------|----------------|---------------|----------|-------|
| 6154 | Fukushima Medical University Hospital Institutional Review Board                                 | Fukushima Medical University Hospital           | Fukushima-shi  | Fukushima-Ken | 960-1295 | Japan |
| 6155 | Sapporo City General Hospital The Ethical Committee of Sapporo City General Hospital             | Sapporo City General Hospital                   | Sapporo-shi    | Hokkaido      | 060-8604 | Japan |
| 6115 | Asahikawa Medical University Hospital Institutional Review Board                                 | Asahikawa Medical University Hospital           | Asahikawa-shi  | Hokkaido      | 078-8510 | Japan |
| 6161 | Tohoku University Hospital Institutional Review Board                                            | Tohoku University Hospital                      | Sendai-shi     | Miyagi-Ken    | 980-8574 | Japan |
| 6116 | Akita University Hospital Institutional Review Board                                             | Akita University Hospital                       | Akita-shi      | Akita-Ken     | 010-8543 | Japan |
| 6100 | Hattori Clinic Institutional Review Board                                                        | Shuhokai Ohtsuka Eye Hospital                   | Sapporo-shi    | Hokkaido      | 001-0016 | Japan |
| 6175 | Aomori Prefectural Central Hospital the ethical committee in Aomori Prefectural Central Hospital | Aomori Prefectural Central Hospital             | Aomori         | Aomori        | 030-8553 | Japan |
| 6117 | Kitami Red Cross Hospital Institutional Review Board                                             | Kitami Red Cross Hospital                       | Kitami-shi     | Hokkaido      | 090-8666 | Japan |
| 6118 | Jusendo General Hospital Independent Ethics Committee                                            | Jusendo General Hospital                        | Koriyama-shi   | Fukushima-Ken | 963-8585 | Japan |
| 6182 | Yamagata University Hospital Institutional Review Board                                          | Yamagata University Hospital                    | Yamagata-shi   | Yamagata-Ken  | 990-9585 | Japan |
| 6101 | Hattori Clinic Institutional Review Board                                                        | Yoshida Eye Hospital                            | Hakodate-shi   | Hokkaido      | 041-0851 | Japan |
| 6119 | Gunma University Hospital Institutional Review Board                                             | Gunma University Hospital                       | Maebashi-shi   | Gunma-Ken     | 371-8511 | Japan |
| 6107 | Tokyo Medical University Ibaraki Medical Center Institutional Review Board                       | Tokyo Medical University Ibaraki Medical Center | Inashiki-gun   | Ibaraki-Ken   | 300-0395 | Japan |
| 6102 | Hattori Clinic Institutional Review Board                                                        | Aoyagi Eye Clinic                               | Ueda-shi       | Nagano-Ken    | 386-0002 | Japan |
| 6120 | Dokkyo Medical University Hospital Institutional Review Board                                    | Dokkyo Medical University Hospital              | Shimotsuga-gun | Tochigi-Ken   | 321-0293 | Japan |
| 6121 | Jichi Medical University Hospital Institutional Review Board                                     | Jichi Medical University Hospital               | Shimotsuke-shi | Tochigi-Ken   | 329-0498 | Japan |
| 6103 | Matsumoto Dental University Hospital Institutional Review Board                                  | Matsumoto Dental University Hospital            | Shiojiri-shi   | Nagano-Ken    | 399-0781 | Japan |
| 6122 | Tsukuba University Hospital Institutional Review Board                                           | Tsukuba University Hospital                     | Tsukuba-shi    | Ibaraki-Ken   | 305-8576 | Japan |
| 6162 | Saitama Medical University Hospital Institutional Review Board                                   | Saitama Medical University Hospital             | Iruma-gun      | Saitama-Ken   | 350-0495 | Japan |
| 6163 | Toho University Sakura Medical Center Independent Ethics Committee                               | Toho University Sakura Medical Center           | Sakura-shi     | Chiba-Ken     | 285-8741 | Japan |
| 6199 | Juntendo University Urayasu Hospital Institutional Review Board                                  | Juntendo University Urayasu Hospital            | Urayasu-shi    | Chiba-Ken     | 279-0021 | Japan |
| 6123 | Saitama Red Cross Hospital Institutional Review Board                                            | Saitama Red Cross Hospital                      | Saitama-shi    | Saitama-Ken   | 338-8553 | Japan |
| 6156 | Hattori Clinic Institutional Review Board                                                        | Hoeikai Hoshiai Eye Clinic                      | Saitama-shi    | Saitama-Ken   | 336-0963 | Japan |
| 6104 | Yokohama City University Medical Center Institutional Review Board                               | Yokohama City University Medical Center         | Yokohama-shi   | Kanagawa-Ken  | 232-0024 | Japan |

|      |                                                                                |                                                     |               |               |          |       |
|------|--------------------------------------------------------------------------------|-----------------------------------------------------|---------------|---------------|----------|-------|
| 6124 | Yokohama City University Hospital Institutional Review Board                   | Yokohama City University Hospital                   | Yokohama-shi  | Kanagawa-Ken  | 236-0004 | Japan |
| 6125 | Yokosuka Kyosai Hospital Institutional Review Board                            | Yokosuka Kyosai Hospital                            | Yokohama-shi  | Kanagawa-Ken  | 236-0004 | Japan |
| 6183 | Seirei Hamamatsu General Hospital Institutional Review Board                   | Seirei Hamamatsu General Hospital                   | Hamamatsu-shi | Shizuoka-Ken  | 430-8558 | Japan |
| 6108 | St. Marianna University School of Medicine Hospital Institutional Review Board | St. Marianna University School of Medicine Hospital | Kawasaki-shi  | Kanagawa-Ken  | 216-8511 | Japan |
| 6126 | Shizuoka Saiseikai General Hospital Internal Review Board                      | Shizuoka Saiseikai General Hospital                 | Shizuoka-shi  | Shizuoka-Ken  | 422-8527 | Japan |
| 6127 | Juntendo University Shizuoka Hospital Institutional Review Board               | Juntendo University Shizuoka Hospital               | Izunokuni-shi | Shizuoka-Ken  | 410-2295 | Japan |
| 6109 | Hattori Clinic Institutional Review Board                                      | Ishikawa Eye Clinic                                 | Shizuoka-shi  | Shizuoka-Ken  | 420-0841 | Japan |
| 6176 | Hattori Clinic Institutional Review Board                                      | Kaiya Ophthalmology                                 | Hamamatsu-shi | Shizuoka-Ken  | 430-0903 | Japan |
| 6105 | Hattori Clinic Institutional Review Board                                      | Totsukaekimae Suzuki Eye Clinic                     | Yokohama-shi  | Kanagawa-Ken  | 244-0003 | Japan |
| 6177 | Nihon University Hospital Institutional Review Board                           | Nihon University Hospital                           | Chiyoda-ku    | Tokyo-To      | 101-8309 | Japan |
| 6164 | Kyorin University Hospital Institutional Review Board                          | Kyorin University Hospital                          | Mitaka-shi    | Tokyo-To      | 181-8611 | Japan |
| 6165 | Tokyo Medical University Hospital Institutional Review Board                   | Tokyo Medical University Hospital                   | Shinjuku-ku   | Tokyo-To      | 160-0023 | Japan |
| 6128 | University of Yamanashi Hospital Institutional Review Board                    | University of Yamanashi Hospital                    | Chuo-shi      | Yamanashi-Ken | 409-3898 | Japan |
| 6129 | Saiando Ochanomizu Inoue Eye Clinic Institutional Review Board                 | Saiando Ochanomizu Inoue Eye Clinic                 | Chiyoda-ku    | Tokyo-To      | 101-0062 | Japan |
| 6130 | Tokyo Medical University Hachioji Medical Center Institutional Review Board    | Tokyo Medical University Hachioji Medical Center    | Hachioji-shi  | Tokyo-To      | 193-0998 | Japan |
| 6187 | Juntendo University Hospital Institutional Review Board                        | Juntendo University Hospital                        | Bunkyo-ku     | Tokyo-To      | 113-8431 | Japan |
| 6173 | Tokyo Women's Medical University Hospital Institutional Review Board           | Tokyo Women's Medical University Hospital           | Shinjuku-ku   | Tokyo-To      | 162-8666 | Japan |
| 6131 | Nagoya University Hospital Institutional Review Board                          | Nagoya University Hospital                          | Nagoya-shi    | Aichi-Ken     | 466-8560 | Japan |
| 6132 | Mie University Hospital Internal Review Board                                  | Mie University Hospital                             | Tsu-shi       | Mie-Ken       | 514-8507 | Japan |
| 6133 | Hattori Clinic Institutional Review Board                                      | Shozankai Miyake Eye Hospital                       | Nagoya-shi    | Aichi-Ken     | 462-0825 | Japan |
| 6134 | JCHO Chukyo Hospital Institutional Review Board                                | JCHO Chukyo Hospital                                | Nagoya-shi    | Aichi-Ken     | 457-8510 | Japan |
| 6188 | Fujita Health University Hospital Institutional Review Board                   | Fujita Health University Hospital                   | Toyoake-shi   | Aichi-Ken     | 470-1192 | Japan |
| 6110 | Hattori Clinic Institutional Review Board                                      | Koyokai Yayoi Hospital                              | Toyohashi-shi | Aichi-Ken     | 441-8106 | Japan |
| 6178 | Aichi Medical University Hospital Institutional Review Board                   | Aichi Medical University Hospital                   | Nagakute-shi  | Aichi-Ken     | 480-1195 | Japan |
| 6136 | Hattori Clinic Institutional Review Board                                      | Nishijima Eye Clinic                                | Kyoto-shi     | Kyoto-Fu      | 604-0837 | Japan |
| 6157 | Shiga University of Medical Science Hospital Institutional Review Board        | Shiga University of Medical Science Hospital        | Otsu-shi      | Shiga-Ken     | 520-2192 | Japan |

|      |                                                                               |                                                    |                 |               |          |       |
|------|-------------------------------------------------------------------------------|----------------------------------------------------|-----------------|---------------|----------|-------|
| 6189 | Kyoto University Hospital Institutional Review Board                          | Kyoto University Hospital                          | Kyoto-shi       | Kyoto-Fu      | 606-8507 | Japan |
| 6158 | Kanazawa University Hospital Institutional Review Board                       | Kanazawa University Hospital                       | Kanazawa-shi    | Ishikawa-Ken  | 920-8641 | Japan |
| 6190 | Toyama University Hospital Institutional Review Board                         | Toyama University Hospital                         | Toyama-shi      | Toyama-Ken    | 930-0194 | Japan |
| 6166 | Osaka University Hospital Institutional Review Board                          | Osaka University Hospital                          | Suita-shi       | Osaka-Fu      | 565-0871 | Japan |
| 6179 | Kansai Medical University Hospital Institutional Review Board                 | Kansai Medical University Hospital                 | Hirakata-shi    | Osaka-Fu      | 573-1191 | Japan |
| 6191 | Hyogo College of Medicine Hospital Institutional Review Board                 | Hyogo College of Medicine Hospital                 | Nishinomiya-shi | Hyogo-Ken     | 663-8501 | Japan |
| 6200 | Hyogo Prefectural Amagasaki General Medical Center Institutional Review Board | Hyogo Prefectural Amagasaki General Medical Center | Amagasaki-shi   | Hyogo-Ken     | 660-8550 | Japan |
| 6137 | Kansai Medical University Medical Center Institutional Review Board           | Kansai Medical University Takii Hospital           | Moriguchi-shi   | Osaka-Fu      | 570-8507 | Japan |
| 6138 | Steel Memorial Hirohata Hospital Institutional Review Board                   | Steel Memorial Hirohata Hospital                   | Himeji-shi      | Hyogo-Ken     | 671-1122 | Japan |
| 6159 | Nara Medical University Hospital Institutional Review Board                   | Nara Medical University Hospital                   | Kashihara-shi   | Nara-Ken      | 634-8522 | Japan |
| 6184 | Kobe Kaisei Hospital Institutional Review Board                               | Kobe Kaisei Hospital                               | Kobe-shi        | Hyogo-Ken     | 657-0068 | Japan |
| 6160 | Kindai University Hospital Independent Ethics Committee                       | Kindai University Hospital                         | Osakasayama-shi | Osaka-Fu      | 589-8511 | Japan |
| 6202 | Japan Red Cross Society Wakayama Medical Center Independent Ethics Committee  | Japan Red Cross Society Wakayama Medical Center    | Wakayama-shi    | Wakayama-Ken  | 640-8558 | Japan |
| 6180 | Kakogawa City West Hospital Institutional Review Board                        | Kakogawa City West Hospital                        | Kakogawa-shi    | Hyogo-Ken     | 675-8611 | Japan |
| 6139 | Kagawa University Hospital Institutional Review Board                         | Kagawa University Hospital                         | Kita-gun        | Kagawa-Ken    | 761-0793 | Japan |
| 6140 | Hiroshima University Hospital Institutional Review Board                      | Hiroshima University Hospital                      | Hiroshima-shi   | Hiroshima-Ken | 734-8551 | Japan |
| 6141 | Ehime University Hospital Independent Ethics Committee                        | Ehime University Hospital                          | Toon-shi        | Ehime-Ken     | 791-0295 | Japan |
| 6185 | Tokushima University Hospital Institutional Review Board                      | Tokushima University Hospital                      | Tokushima-shi   | Tokushima-Ken | 770-8503 | Japan |
| 6167 | Kochi Medical School Hospital Institutional Review Board                      | Kochi Medical School Hospital                      | Nankoku-shi     | Kochi-Ken     | 783-8505 | Japan |
| 6111 | Matsuyama Red Cross Hospital Institutional Review Board                       | Matsuyama Red Cross Hospital                       | Matsuyama-shi   | Ehime-Ken     | 790-8524 | Japan |
| 6192 | Kyushu University Hospital Institutional Review Board                         | Kyushu University Hospital                         | Higashi-ku      | Fukuoka       | 812-8582 | Japan |
| 6143 | Japanese Red Cross Nagasaki Genbaku Hospital Independent Ethics Committee     | Japanese Red Cross Nagasaki Genbaku Hospital       | Nagasaki-shi    | Nagasaki-Ken  | 852-8511 | Japan |
| 6144 | Kagoshima University Hospital Institutional Review Board                      | Kagoshima University Medical And Dental Hospital   | Kagoshima-shi   | Kagoshima-Ken | 890-8520 | Japan |
| 6193 | University of Miyazaki Hospital Institutional Review Board                    | University of Miyazaki Hospital                    | Miyazaki-shi    | Miyazaki-Ken  | 889-1692 | Japan |

|      |                                                                                    |                                                              |                  |               |          |                    |
|------|------------------------------------------------------------------------------------|--------------------------------------------------------------|------------------|---------------|----------|--------------------|
| 6168 | Meiwakai Miyata Ophthalmic Hospital Institutional Review Board                     | Meiwakai Miyata Ophthalmic Hospital                          | Miyakonogoshi    | Miyazaki-Ken  | 885-0051 | Japan              |
| 6194 | Fukuoka University Hospital Institutional Review Board                             | Fukuoka University Hospital                                  | Fukuoka-shi      | Fukuoka-Ken   | 814-0180 | Japan              |
| 6145 | Nagasaki University Hospital Institutional Review Board                            | Nagasaki University Hospital                                 | Nagasaki-shi     | Nagasaki-Ken  | 852-8501 | Japan              |
| 6195 | University of Occupational and Environmental Health Hospital Internal Review Board | University of Occupational and Environmental Health Hospital | Kitakyushu-shi   | Fukuoka-Ken   | 807-8556 | Japan              |
| 6169 | Meiwakai Kagoshima Miyata Ophthalmic Hospital Institutional Review Board           | Meiwakai Kagoshima Miyata Ophthalmic Hospital                | Kagoshima-shi    | Kagoshima-Ken | 890-0046 | Japan              |
| 6106 | Hattori Clinic Institutional Review Board                                          | Taidokai Sato Gankalin Domachi Clinic                        | Yamagata-shi     | Yamagata-Ken  | 990-0051 | Japan              |
| 6146 | Yonezawa City Hospital Institutional Review Board                                  | Yonezawa City Hospital                                       | Yonezawa-shi     | Yamagata-Ken  | 992-8502 | Japan              |
| 6170 | JOHAS Tohoku Rosai Hospital Institutional Review Board                             | JOHAS Tohoku Rosai Hospital                                  | Sendai-shi       | Miyagi-Ken    | 981-8563 | Japan              |
| 6114 | Meiji University of Integrative Medicine Institutional Review Board                | Meiji University of Integrative Medicine                     | Nantan-shi       | Kyoto-Fu      | 629-0392 | Japan              |
| 6174 | Obihiro Kyokai Hospital Institutional Review Board                                 | Obihiro Kyokai Hospital                                      | Obihiro-shi      | Hokkaido      | 080-0805 | Japan              |
| 6171 | Sapporo Medical University Hospital Institutional Review Board                     | Sapporo Medical University Hospital                          | Sapporo-shi      | Hokkaido      | 060-8543 | Japan              |
| 6148 | Ogaki Tokushukai Hospital Tokushukai Ethics Committee                              | Ogaki Tokushukai Hospital                                    | Ogaki-shi        | Gifu-Ken      | 503-0015 | Japan              |
| 6112 | Hattori Clinic Institutional Review Board                                          | Tagawa Eye Clinic                                            | Kanazawa-shi     | Ishikawa-Ken  | 920-1151 | Japan              |
| 6186 | University of Fukui Hospital Institutional Review Board                            | University of Fukui Hospital                                 | Yoshidagun       | Fukui-Ken     | 910-1193 | Japan              |
| 6150 | Japanese Red Cross Society Suwa Hospital Institutional Review Board                | Japanese Red Cross Society Suwa Hospital                     | Suwa-shi         | Nagano-Ken    | 392-8510 | Japan              |
| 6151 | Hattori Clinic Institutional Review Board                                          | Hirota Eye Clinic                                            | Shunan-shi       | Yamaguchi-Ken | 745-0017 | Japan              |
| 6113 | Hattori Clinic Institutional Review Board                                          | Dannoue Eye Clinic                                           | Kawasaki-shi     | Kanagawa-Ken  | 211-0053 | Japan              |
| 6152 | Hattori Clinic Institutional Review Board                                          | Jigankai Sanjo Eye Clinic                                    | Sanjo-shi        | Niigata-Ken   | 955-0852 | Japan              |
| 6153 | Hattori Clinic Institutional Review Board                                          | Infinity Medical Group Kondo Eye Clinic                      | Hachioji-shi     | Tokyo-To      | 192-0081 | Japan              |
| 6172 | Hattori Clinic Institutional Review Board                                          | Musashi Dream Eye Clinic                                     | Osaka-shi        | Osaka-Fu      | 543-0027 | Japan              |
| 6181 | Toho University Ohashi Medical Center Institutional Review Board                   | Toho University Ohashi Medical Center                        | Meguro-ku        | Tokyo-To      | 153-8515 | Japan              |
| 6196 | Hattori Clinic Institutional Review Board                                          | Shinseikai Toyama Hospital                                   | Imizu-shi        | Toyama-Ken    | 939-0243 | Japan              |
| 6197 | Hattori Clinic Institutional Review Board                                          | Ando Eye Clinic                                              | Ashigarakami-gun | Kanagawa-Ken  | 258-0003 | Japan              |
| 6198 | Juntendo University Nerima Hospital Institutional Review Board                     | Juntendo University Nerima Hospital                          | Nerima-ku        | Tokyo-To      | 177-8521 | Japan              |
| 6600 | Kangnam Sacred Heart Hospital IRB Membership List                                  | Hallym University Kangnam Sacred Heart Hospital              | Seoul            |               | 150-950  | Korea, Republic of |
| 6601 | Seoul National University Bundang Hospital                                         | Seoul National University Bundang Hospital                   | Seongnam-si      | Gyeonggi-do   | 13620    | Korea, Republic of |

|      |                                                                                                                               |                                                             |              |                  |         |                    |
|------|-------------------------------------------------------------------------------------------------------------------------------|-------------------------------------------------------------|--------------|------------------|---------|--------------------|
| 6602 | Seoul National University Hospital Institutional Review Board                                                                 | Seoul National University Hospital                          | Seoul        | Gyeonggi-do      | 110744  | Korea, Republic of |
| 6603 | Kim's Eye Hospital IRB                                                                                                        | Kim's Eye Hospital                                          | Seoul        |                  | 150-034 | Korea, Republic of |
| 6604 | Seoul St. Mary's Hospital, The Catholic University of Korea IRB                                                               | The Catholic University of Korea, Seoul St. Mary's Hospital | Seocho-gu    |                  | 137-701 | Korea, Republic of |
| 6605 | The Institutional Review Board of Kyungpook National University Hospital                                                      | Kyungpook National University Hospital                      | Daegu        | Gyeongsangbuk-do | 700-721 | Korea, Republic of |
| 6606 | Yonsei University Gangnam Severance Hospital, Institutional Review Board                                                      | Gangnam Severance Hospital, Yonsei University Health System | Gangnam-gu   |                  | 062 73  | Korea, Republic of |
| 6607 | PNUH Institutional Review Board                                                                                               | Pusan National University Hospital                          | Busan        |                  | 602-739 | Korea, Republic of |
| 6608 | IRB of Inje University Busan Paik Hospital                                                                                    | Inje University Busan Paik Hospital                         | Busan        |                  | 47392   | Korea, Republic of |
| 6609 | Yeungnam University Hospital Institutional Review Board                                                                       | Yeungnam University Hospital                                | Daegu        |                  | 42415   | Korea, Republic of |
| 6610 | Asan Medical Center IRB                                                                                                       | Asan Medical Center                                         | Seoul        |                  | 055 05  | Korea, Republic of |
| 6612 | KHUH IRB                                                                                                                      | Kyung Hee University Hospital                               | Seoul        |                  | 024 47  | Korea, Republic of |
| 6652 | Samsung Medical Center Institutional Review Board                                                                             | Samsung Medical Center                                      | Seoul        |                  | 063 51  | Korea, Republic of |
| 6611 | The Institutional Review Board of Ajou University Hospital                                                                    | Ajou University Hospital                                    | Gyeonggi-do  | Gyeonggi-do      | 16499   | Korea, Republic of |
| 1400 | Comite de Etica en Investigacion de la facultad de Medicina y Hospital Universitario de la Universidad Autonoma de Nuevo Leon | Hospital Universitario Dr Jose E Gonzalez                   | Monterrey    | Nuevo León       | 64460   | Mexico             |
| 1401 | Comite de Etica en Investigacion de la Escuela de Medicina del Instituto Tecnologico y de Estudios Superiores de Monterrey    | CIIES                                                       | Monterrey    | Nuevo León       | 64710   | Mexico             |
| 1403 | Comite de Investigacion Instituo de Oftalmologia Fundacion de Asistencia Privada                                              | Instituto de Oftalmología Fundación Conde de la Valenciana  | Mexico City  | Distrito Federal | 0 6800  | Mexico             |
| 1405 | Comite de Etica e Investigacion Fundacion Hospital "Nuestra Señora de la Luz"                                                 | Hospital Oftalmológico Nuestra Señora de la Luz             | Mexico City  | Distrito Federal | 0 6030  | Mexico             |
| 1406 | Comite de Investigacion de la Clinica Bajo CLINBA S.C.                                                                        | Clínica de Ojos Monterrey S.A. de C.V.                      | Guanajuato   | Nuevo León       | 36090   | Mexico             |
| 1412 | Comite Independiente de Etica de Investigación y Bioseguridad del Bajío SC                                                    | Dr. Alejandro Dalma y asoc.                                 | Guanajuato   | Distrito Federal | 36090   | Mexico             |
| 1413 | Comite Independiente de Etica de Investigación y Bioseguridad del Bajío SC                                                    | RetimediQ Centro de Retina y Oftalmología Especializada     | Guanajuato   | Yucatán          | 36090   | Mexico             |
| 5100 | Medical Ethics Committee, University Malaya Medical Centre                                                                    | University of Malaya Eye Research Centre                    | Kuala Lumpur | Kuala Lumpur     | 59100   | Malaysia           |
| 5101 | Medical Research Ethics Committee, Ministry of Health Malaysia                                                                | Hospital Selayang                                           | Kuala Lumpur | Selangor         | 59000   | Malaysia           |



|      |                                                                                          |                                                        |               |               |          |             |
|------|------------------------------------------------------------------------------------------|--------------------------------------------------------|---------------|---------------|----------|-------------|
| 5102 | Medical Research & Ethics Committee<br>Kementerian Kesihatan Malaysia                    | International Specialist Eye Centre                    | Kuala Lumpur  | Kuala Lumpur  | 59000    | Malaysia    |
| 5103 | Universiti Kebangsaan Malaysia Medical Centre                                            | Pusat Perubatan Universiti Kebangsaan Malaysia         | Kuala Lumpur  | Kuala Lumpur  | 56000    | Malaysia    |
| 4100 | Medisch Ethische Toetsingscommissie                                                      | Sint Elisabeth Ziekenhuis Afd. Oogheelkunde            | Tilburg       | Noord-Brabant | 5022 GC  | Netherlands |
| 4101 | Medisch Ethische Toetsingscommissie                                                      | OMC Amsterdam                                          | Tilburg       | Noord-Brabant | 5022 GC  | Netherlands |
| 4103 | Medisch Ethische Toetsingscommissie                                                      | Flevoziekenhuis                                        | Tilburg       | Noord-Brabant | 5022 GC  | Netherlands |
| 8500 | Hospital Nacional Guillermo Almenara Irigoyen Comité de Etica en Investigacion           | Hospital Nacional Guillermo Almenara Irigoyen          | Lima          |               | 15036    | Peru        |
| 8501 | Comite Institucional de Etica en Investigacion de la Universidad de San Martin de Porres | Instituto Oftalmosalud S.R.L                           | Lima          |               | 15036    | Peru        |
| 8502 | Comite Institucional de Etica en Investigacion de la Universidad de San Martin de Porres | Macula D&T                                             | Lima          |               | 15036    | Peru        |
| 8503 | Prisma ONG                                                                               | Ophtalmology-TG Laser Oftalmica                        | Lima          |               | 15036    | Peru        |
| 4200 | Ethics Committee of Silesian Medical Chamber                                             | Samodzielny Publiczny ZOZ                              | Grazynski ego |               | 40-126   | Poland      |
| 4205 | Ethics Committee of Silesian Medical Chamber                                             | NZOZ Lens-Med                                          | Grazynski ego |               | 40-126   | Poland      |
| 4201 | Ethics Committee of Silesian Medical Chamber                                             | 10 Wojskowy Szpital Kliniczny                          | Grazynski ego |               | 40-126   | Poland      |
| 4206 | Ethics Committee of Silesian Medical Chamber                                             | Szpital Specjalistyczny im Sokołowskiego               | Grazynski ego |               | 40-126   | Poland      |
| 4202 | Ethics Committee of Silesian Medical Chamber                                             | NZOZ Ocu Service                                       | Grazynski ego |               | 40-126   | Poland      |
| 4203 | Ethics Committee of Silesian Medical Chamber                                             | Specjalistyczny Cabinet Lekarski Krystyna Raczynska    | Grazynski ego |               | 40-126   | Poland      |
| 4204 | Ethics Committee of Silesian Medical Chamber                                             | NZOZ Medilens                                          | Grazynski ego |               | 40-126   | Poland      |
| 4211 | Ethics Committee of Silesian Medical Chamber                                             | Wojewódzki Szpital Okulistyczny w Krakowie             | Grazynski ego |               | 40-126   | Poland      |
| 4212 | Ethics Committee of Silesian Medical Chamber                                             | Centrum Diagnostyki i Mikrochirurgii Oka LENS          | Grazynski ego |               | 40-126   | Poland      |
| 4213 | Ethics Committee of Silesian Medical Chamber                                             | Szpital Specjalistyczny IM J.K. Lukowicza              | Grazynski ego |               | 40-126   | Poland      |
| 4217 | Ethics Committee of Silesian Medical Chamber                                             | Centrum Medyczne Uno-Med (Private Practice)            | Grazynski ego |               | 40-126   | Poland      |
| 4219 | Ethics Committee of Silesian Medical Chamber                                             | Szpital Zakonu Bonifratrów im. Św. Jana Bożego w Łodzi | Grazynski ego |               | 40-126   | Poland      |
| 4220 | Ethics Committee of Silesian Medical Chamber                                             | Wojskowy Instytut Medyczny                             | Grazynski ego |               | 40-126   | Poland      |
| 4221 | Ethics Committee of Silesian Medical Chamber                                             | Medical University of Lublin                           | Grazynski ego |               | 40-126   | Poland      |
| 4300 | Aibili Comissao de Etica para a Saude                                                    | AIBILI                                                 | Porto Salvo   |               | 2740-262 | Portugal    |
| 4303 | Hospital Lusíadas Lisboa Comissao de Etica para a                                        | HPP - Hospital dos Lusíadas                            | Lisbon        |               | 1500-458 | Portugal    |

|      |                                                                                                                                                     |                                                                                                      |                      |  |          |          |
|------|-----------------------------------------------------------------------------------------------------------------------------------------------------|------------------------------------------------------------------------------------------------------|----------------------|--|----------|----------|
|      | Saude                                                                                                                                               |                                                                                                      |                      |  |          |          |
| 4304 | Centro Hospitalar de Entre o Douro e Vouga, E.P.E.                                                                                                  | Centro Hospitalar de Entre o Douro e Vouga, E.P.E - Hospital de São Sebastião                        | Santa Maria da Feira |  | 4520-211 | Portugal |
| 4306 | Centro Hospitalar Leiria Comissao de Etica                                                                                                          | Centro Hospitalar Leiria - Hospital Santo André                                                      | Leiria               |  | 2410-197 | Portugal |
| 4301 | Centro Hospitalar Leiria Comissao de Etica                                                                                                          | Hospital Pedro Hispano                                                                               | Leiria               |  | 2410-197 | Portugal |
| 4302 | Centro Hospitalar Do Baixo Vouga, E.P.E./Aveiro                                                                                                     | Centro Hospitalar do Baixo Vouga, E.P.E. – Unidade de Aveiro                                         | Aveiro               |  | 3814-501 | Portugal |
| 4305 | CEIC - Parque de Saude de Lisboa                                                                                                                    | Espaço Médico de Coimbra                                                                             | Lisboa               |  | 1749-004 | Portugal |
| 4407 | The Committee of Biomedical Ethics of Ufa Institute of scientific-research of eye diseases of Academy of Sciences (Bashkortostan)                   | SBI "Ufa scientific research institute of eye diseases of academy of sciences of the republic of Bas | Ufa                  |  | 450077   | Russia   |
| 4400 | The Ethics Committee of "The Postgraduating Doctors' Training Institute" of the Healthcare and Social Development Ministry of the Chuvash Republic  | The S.N.Fyodorov Federal State Institution Eye Microsurgery Complex (Cheboxary)                      | Cheboksary           |  | 428003   | Russia   |
| 4412 | The Ethics Committee of GBUZ SOCOB n.a. T.I. Eroshevsky                                                                                             | SBEI HPE "Samara State Medical University" of the MoH of the RF                                      |                      |  | 443099   | Russia   |
| 4423 | The Independent Multidisciplinary Committee on Ethical Review of Clinical Trials                                                                    | The Irkutsk Affiliate of Federal State Budgetary Institution "MNTK ye Microsurgery Complex" n.a. S.N | Moscow               |  | 125468   | Russia   |
| 4403 | The Independent Multidisciplinary Committee on Ethical Review of Clinical Trials                                                                    | Institution of Republic Sakha (Yakutiya) Yakutsk Republican Ophthalmology Hospital                   | Moscow               |  | 125468   | Russia   |
| 4402 | The Independent Multidisciplinary Committee on Ethical Review of Clinical Trials                                                                    | The S.N.Fyodorov Federal State Institution Eye Microsurgery Complex (Khabarovsk)                     | Moscow               |  | 125468   | Russia   |
| 4404 | The Independent Multidisciplinary Committee on Ethical Review of Clinical Trials                                                                    | Territorial Diabetic Center                                                                          | Moscow               |  | 125468   | Russia   |
| 4401 | The Independent Multidisciplinary Committee on Ethical Review of Clinical Trials                                                                    | Dignostic Center №7                                                                                  | Moscow               |  | 125468   | Russia   |
| 4406 | The Ethics Committee of "Federal State budgetary Institution "Scientific Research Institute of Eye Diseases" of Russian Academy of medical Sciences | Scientific Research Institute of Eye Diseases                                                        | Moscow               |  | 119021   | Russia   |
| 4408 | The Ethics Committee of The Helmholtz Moscow Research Institute of Eye Diseases                                                                     | Moscow Helmholtz Research Institute of Ophthalmology                                                 | Moscow               |  | 105062   | Russia   |

|      |                                                                                                                                       |                                                                                         |             |  |         |              |
|------|---------------------------------------------------------------------------------------------------------------------------------------|-----------------------------------------------------------------------------------------|-------------|--|---------|--------------|
| 4405 | The Independent Multidisciplinary Committee on Ethical Review of Clinical Trials                                                      | Tyumen Regional Ophthalmology Dispensary                                                | Moscow      |  | 125468  | Russia       |
| 4419 | The Independent Multidisciplinary Committee on Ethical Review of Clinical Trials                                                      | Chita State Medical Academy                                                             | Moscow      |  | 125468  | Russia       |
| 4418 | The Independent Multidisciplinary Committee on Ethical Review of Clinical Trials                                                      | The S.N.Fyodorov Federal State Institution Eye Microsurgery Complex (Tambov)            | Moscow      |  | 125468  | Russia       |
| 4420 | The Independent Multidisciplinary Committee on Ethical Review of Clinical Trials                                                      | SBHI "Penza Regional Ophtalmological Hospital"                                          | Moscow      |  | 125468  | Russia       |
| 4421 | The Independent Multidisciplinary Committee on Ethical Review of Clinical Trials                                                      | BI of Khanty-Mansyisk region Yugra "Surgut regional clinical hospital"                  | Moscow      |  | 125468  | Russia       |
| 4422 | The Independent Multidisciplinary Committee on Ethical Review of Clinical Trials                                                      | Krasnodar Branch of The S.N. Fyodorov FSBI "Eye microsurgery complex"                   | Moscow      |  | 125468  | Russia       |
| 4425 | The Independent Multidisciplinary Committee on Ethical Review of Clinical Trials                                                      | SBEI HPE "Saratov State Medical University n.a. V. I. Razumovskiy" of the MoH of the RF | Moscow      |  | 125468  | Russia       |
| 4426 | State Autonomous Healthcare Institution "Republican Clinical Ophthalmologic Hospital of the Ministry of Health of Tatarstan Republic" | SAIH "Republican clinical ophthalmological hospital of MoH of Republic of Tatarstan"    | Kazan       |  | 420012  | Russia       |
| 4424 | Biomedical Ethics Committee of Federal State Budgetary Institution of scientific and technical complex of Microsurgical eye           | MBHI City Clinical Hospital #11                                                         | Novosibirsk |  | 630071  | Russia       |
| 4427 | Biomedical Ethics Committee of Federal State Budgetary Institution of scientific and technical complex of Microsurgical eye           | The S.N.Fyodorov Federal State Institution Eye Microsurgery Complex (Novosibirsk)       | Novosibirsk |  | 630071  | Russia       |
| 8901 | Prince Sultan Military Medical City Research Ethics Committee                                                                         | Prince Sultan Military Medical City                                                     | Riyadh      |  | 11159   | Saudi Arabia |
| 8902 | Kingdom of Saudi Arabia - Ministry of National Guard - Health Affairs                                                                 | King Abdullah International Medical Research Center IRB Office                          | Riyadh      |  | 22490   | Saudi Arabia |
| 8900 | King Khaled Eye Specialist Hospital HEC/IRB                                                                                           | King Khaled Eyes Specialist Hospital                                                    | Riyadh      |  | 11462   | Saudi Arabia |
| 8903 | Kingdom of Saudi Arabia - Ministry of National Guard - Health Affairs                                                                 | King Abdullah International Medical Research Center IRB Office                          | Riyadh      |  | 22490   | Saudi Arabia |
| 6300 | Parkway Hospitals Singapore Pte Ltd                                                                                                   | PIEC                                                                                    | Singapore   |  | 238164  | Singapore    |
| 6301 | National Healthcare Group                                                                                                             | NUHS                                                                                    | Singapore   |  | 149547  | Singapore    |
| 6302 | SingHealth Centralised Institutional Review Board                                                                                     | Singapore National Eye Centre                                                           | Singapore   |  | 168753  | Singapore    |
| 8600 | Republic of Slovenia The National Medical Ethics Committee                                                                            | Univerzitetni Klinicni Center Ljubljana Ocesna Klinika                                  | Ljubljana   |  | SI-1525 | Slovenia     |

|      |                                                                                                                                     |                                                                 |                 |  |         |          |
|------|-------------------------------------------------------------------------------------------------------------------------------------|-----------------------------------------------------------------|-----------------|--|---------|----------|
| 8601 | Republic of Slovenia The National Medical Ethics Committee                                                                          | University Medical Centre Maribor                               | Ljubljana       |  | SI-1525 | Slovenia |
| 8602 | Ethical Committee General Hospital Celje                                                                                            | General Hospital Celje                                          | Celje           |  | 3000    | Slovenia |
| 8603 | Republic of Slovenia The National Medical Ethics Committee                                                                          | General Hospital Novo Mesto                                     | Ljubljana       |  | SI-1525 | Slovenia |
| 4500 | *Nemocnica Ruzinov*                                                                                                                 | Univerzitna nemocnica Bratislava, Nemocnica Ruzinov             | Bratislava      |  | 82606   | Slovakia |
| 4502 | EK-Fakultna nemocnica Trencin                                                                                                       | Fakultna nemocnica Trencin                                      | Trencin         |  | 91101   | Slovakia |
| 4504 | EK-Ustredna vojenska nemocnica SNP Ruzomberok                                                                                       | Ustredna vojenska nemocnica SNP Ruzomberok-Fakultna nemocnica   | Ruzomberok      |  | 034 26  | Slovakia |
| 4507 | EK-Fakultna nemocnica s poliklinikou F.D. Roosevelta                                                                                | NsP Banská Bystrica                                             | Banska Bystrica |  | 975 17  | Slovakia |
| 4503 | EK-Fakultna nemocnica Zilina                                                                                                        | Fakultna nemocnica s poliklinikou Zilina                        | Zilina          |  | 012 07  | Slovakia |
| 4501 | Eticka komisia NsP Trebisov a.s.                                                                                                    | Nemocnica s poliklinikou Trebisov a.s.                          | Trebisov        |  | 075 01  | Slovakia |
| 4510 | EK-UN Bratislava, Nemocnica sv. Cyrila a Metoda                                                                                     | Univerzitna nemocnica Bratislava, Nemocnica sv. Cyrila a Metoda | Bratislava      |  | 85107   | Slovakia |
| 4512 | EK-Nemocnica Poprad a.s.                                                                                                            | Nemocnica Poprad a.s.                                           | Poprad          |  | 058 45  | Slovakia |
| 4513 | EK-FNsP Nove Zamky                                                                                                                  | Fakultna nemocnica s poliklinikou Nove Zamky                    | Nove Zamky      |  | 94002   | Slovakia |
| 4514 | Oftal s.r.o, Specializovana nemocnica v odbore oftalmologia                                                                         | Oftal s.r.o.                                                    | Zvolen          |  | 960 01  | Slovakia |
| 4517 | Rozhodnutie Etickej komisie Nemocnica Svateho Michala, a.s.,                                                                        | Nemocnica svateho Michala                                       | Bratislava      |  | 811 08  | Slovakia |
| 4900 | Ankara University Ethics Committee                                                                                                  | Hacettepe University Medical Faculty                            | Ankara          |  | 061 00  | Turkey   |
| 4901 | Ankara University Ethics Committee                                                                                                  | Ankara University Medical Faculty                               | Ankara          |  | 061 00  | Turkey   |
| 4902 | Ankara University Ethics Committee                                                                                                  | Bilim University Florence Nightingale Hospital                  | Ankara          |  | 061 00  | Turkey   |
| 4904 | Ankara University Ethics Committee                                                                                                  | Gazi University Hospital                                        | Ankara          |  | 061 00  | Turkey   |
| 4903 | Ankara University Ethics Committee                                                                                                  | Ankara Ataturk Training and Research Hospital                   | Ankara          |  | 061 00  | Turkey   |
| 8700 | State Institution "The Filatov Institute of Eye Diseases and Tissue Therapy of the National Academy of Medical Sciences of Ukraine" | V.P.Filatov Institute of Eye Diseases and Tissue Therapy AMS    | Odessa          |  | 65061   | Ukraine  |
| 8701 | Local Ethics Committee at the Opphthalmology Clinic Eye Microsurgery Center                                                         | City clinical ophthalmological hospital                         | Kyiv            |  | 3680    | Ukraine  |
| 8702 | Local Ethics Committee at the Communal Institution Dnipropetrovsk Regional Clinical Ophthalmological Hospital                       | Regional clinical hospital n.a. Mechnikova                      | Dnipropetrovsk  |  | 49005   | Ukraine  |
| 8703 | Local Ethics Committee at the Hospital                                                                                              | LLC "Lugansk Regional Central Eye Hospital"                     | Lugansk         |  | 91055   | Ukraine  |

|      |                                                                                     |                                                            |               |               |       |                    |
|------|-------------------------------------------------------------------------------------|------------------------------------------------------------|---------------|---------------|-------|--------------------|
| 8704 | Local Ethics Committee at the Kharkov Regional Clinical Hospital                    | Kharkov Regional Clinical Hospital                         | Kharkiv       |               | 61022 | Ukraine            |
| 9000 | Comité de Etica Independiente de la Fundación Dominicana de Infectología            | Consultorio Oftalmológico Medicalnet                       | Santo Domingo | Santo Domingo | N/A   | Dominican Republic |
| 9001 | Comité de Etica del Centro Cardio-Neuro Oftalmológico y Trasplante CECANOT          | Centro Cardio-Neuro Oftalmológico y Trasplante (CECANOT)   | Santo Domingo | Santo Domingo | N/A   | Dominican Republic |
| 9031 | Instituto Conmemorativo Gorgas de Estudios de la Salud                              | Clínica de Vitreo y Macula Dra. Ana Paz                    | Panamá        | Panamá        | N/A   | Panamá             |
| 9033 | Instituto Conmemorativo Gorgas de Estudios de la Salud                              | Clinica Yee                                                | Panamá        | Panamá        | N/A   | Panamá             |
| 9051 | Comité de Etica Zugueme                                                             | Clínica Oftalmológica Santa Clara                          | Guatemala     | Guatemala     | 1015  | Guatemala          |
| 9061 | Research Ethics Committee - Central Directorate for Research and Health Development | Ministry of Health and Population                          | Cairo         | Cairo         | 11516 | Egypt              |
| 9062 | Research Ethics Committee - Central Directorate for Research and Health Development | Ministry of Health and Population                          | Cairo         | Cairo         | 11516 | Egypt              |
| 9064 | Research Ethics Committee - Central Directorate for Research and Health Development | Ministry of Health and Population                          | Cairo         | Cairo         | 11516 | Egypt              |
| 9065 | Research Ethics Committee - Central Directorate for Research and Health Development | Ministry of Health and Population                          | Cairo         | Alexandria    | 11516 | Egypt              |
| 9066 | Research Ethics Committee - Central Directorate for Research and Health Development | Ministry of Health and Population                          | Cairo         | Cairo         | 11516 | Egypt              |
| 9071 | Instituto Costarricense de Investigaciones Clínicas (ICIC)                          | Instituto de Cirugia Ocular                                | San José      | San José      | N/A   | Costa Rica         |
| 9072 | Instituto Costarricense de Investigaciones Clínicas (ICIC)                          | Clínica 20/20                                              | San José      | San José      | N/A   | Costa Rica         |
| 9073 | Instituto Costarricense de Investigaciones Clínicas (ICIC)                          | Oftalmocima                                                | San José      | San José      | N/A   | Costa Rica         |
| 1500 | Centro Nacional de Bioetica                                                         | Unidad Oftalmologica de Caracas, C.A. Santa Paula          | Caracas       |               | 1060  | Venezuela          |
| 1501 | Centro Nacional de Bioetica                                                         | Clinica de Especialidades Oftalmologicas (Retina & Vitreo) | Caracas       |               | 1060  | Venezuela          |
| 1502 | Centro Nacional de Bioetica                                                         | Centro Oftalmologico de Valencia (CEOVAL)                  | Caracas       |               | 1060  | Venezuela          |
| 1503 | Centro Nacional de Bioetica                                                         | Instituto Oftalmológico IUMO trinidad                      | Caracas       |               | 1060  | Venezuela          |
